# Supplementary material for: Ice Nucleating Properties of Glassy Organic and Organosulfate Aerosol
Source: Copernicus journal article supplement (doi:10.5194/egusphere-2024-3935), 2024-12-19
Supplement: Supplementary file 1 [file egusphere-2024-3935-supplement.pdf]

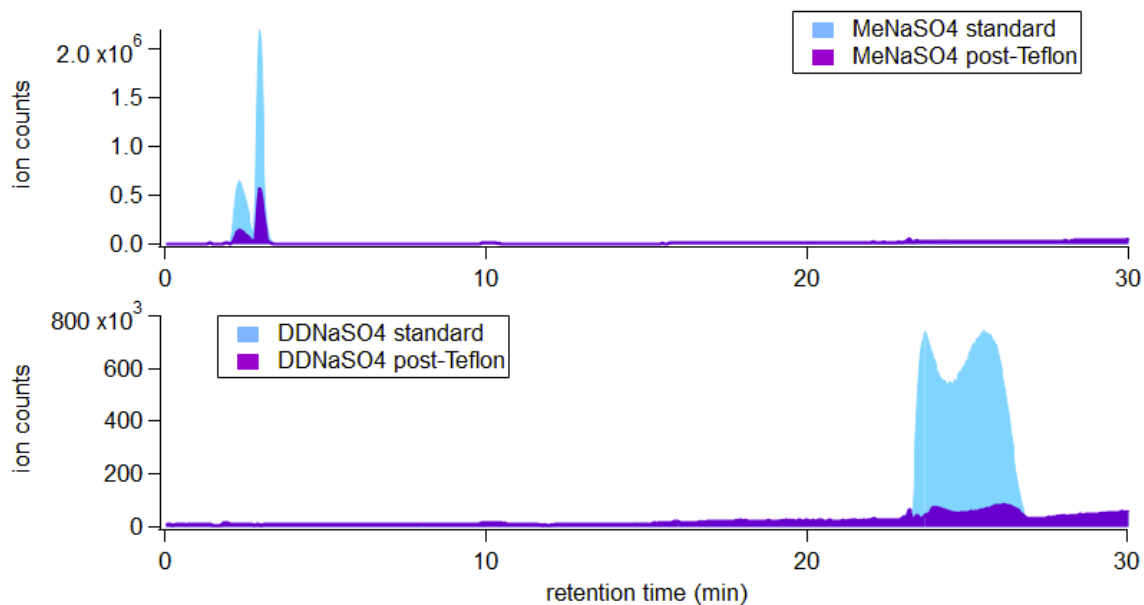

**Figure S1: Base peak chromatograms (BPCs) comparing standards and atomized samples of methyl sodium sulfate (top) and dodecyl sodium sulfate (bottom). Samples have a lower signal intensity compared to background, but no major additional or missing peaks.**

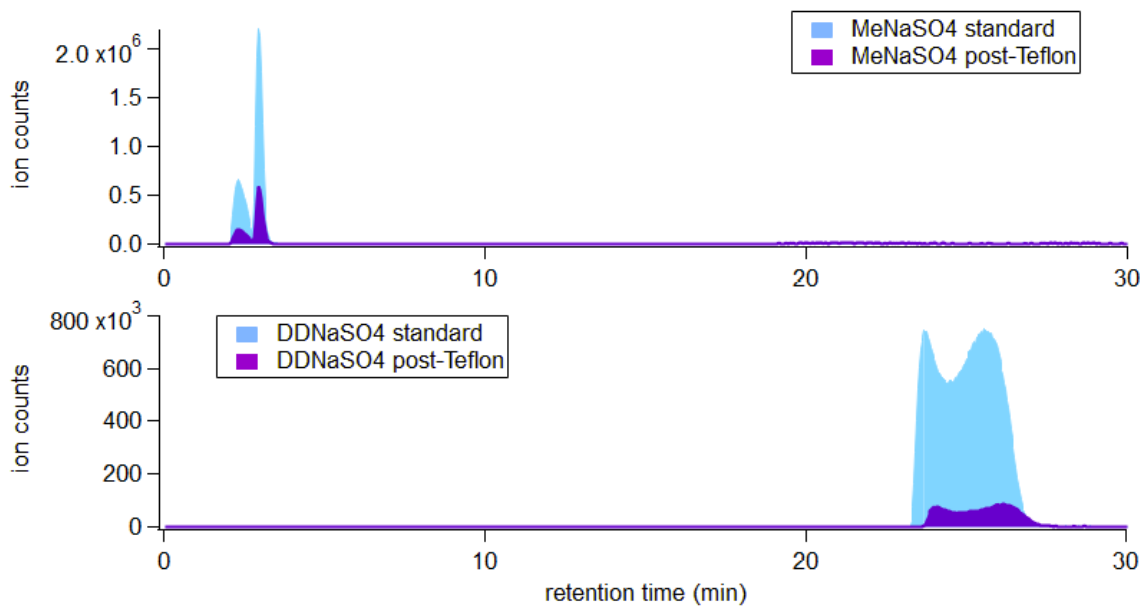

**Figure S2: Extracted ion chromatograms (EICs) comparing standards and atomized samples of methyl sodium sulfate (top) and dodecyl sodium sulfate (bottom). Samples have a lower signal intensity compared to background, but no major additional or missing peaks.**

5

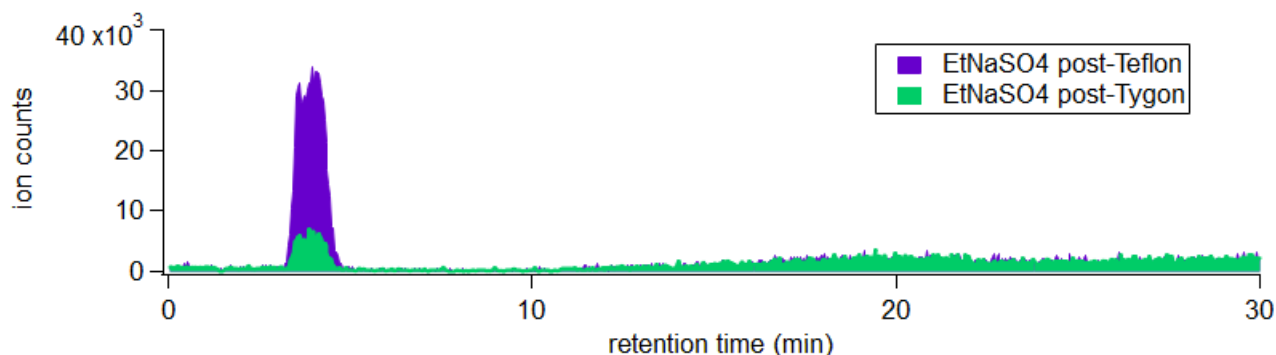

Figure S3: EICs comparing Teflon- and Tygon-atomized samples of ethyl sodium sulfate with similar masses collected on filters.

## 10 RPLC/ESI-HR-QTOFMS Filter Analysis

To ensure that standards were not being degraded during atomization in MeOH, we collected filter samples and compared them to the corresponding pure standards by using reverse-phase liquid chromatography coupled to electrospray ionization high resolution-quadrupole time-of-flight mass spectrometry (RPLC/ESI-HR-QTOFMS). We collected dried atomized sample on Teflon filters (47-mm diameter, 0.2- $\mu\text{m}$  pore size; PALL Corp.) for 40 min at a flowrate of 0.3 L  $\text{min}^{-1}$  to obtain a minimum sample mass of 100  $\mu\text{g}$  and stored at -20  $^{\circ}\text{C}$  until analysis. Filters were extracted by sonicating in MeOH for 45 minutes, after which the extracts were dried and reconstituted in 50:50 MeOH:water. For RPLC/ESI-HR-QTOFMS analysis we used a Waters ACQUITY UPLC HSS T3 column (2.1  $\times$  100 mm, 1.8  $\mu\text{m}$  particle size) and an Agilent 6520 Series LCMS system, at a skimmer voltage of 130 V and a fragmentor voltage of 65 V. Mobile phase A was water and mobile phase B was MeOH, both with 0.05% v/v acetic acid. The 30-min method ran at 0.2 mL  $\text{min}^{-1}$ : from 0-5 min the solvent ratio held at 0% B, after which it rose to 90% B for the next 10.5 min and then to 100% B for the next 4.5 min, where it held for 9.5 min and then dropped to 0% B in 0.5 min.

Methyl sodium sulfate and dodecyl sodium sulfate samples showed no significant degradation compared to the standards (Figures S1 and S2), though the standards and samples had different concentrations. While an authentic standard for ethyl sodium sulfate was not available at the time of analysis, a comparison of Teflon and Tygon atomization tubing showed that at approximately the same sample concentration Teflon tubing resulted in significantly less degradation (Figure S3).

**Table S1: Summary of SPIN OPC scattering parameters used in preliminary classification of particles to initialize machine learning model test dataset. For all columns,  $x$  represents the averaged particle-by-particle value for that 1 sec interval from the SPIN OPC. In the case of that droplet class, all data must be above or equal to water saturation.**

| Class        | $\delta_{SPIN}$        | $\log_{10}(I_{size})$   | $S_{liq}$  |
|--------------|------------------------|-------------------------|------------|
| Aerosol      | $x < 0.16$             | $x \leq 0.125$          | -          |
| Droplet      | $0.16 \leq x \leq 0.4$ | $0.4 \leq x$            | $1 \leq x$ |
| Ice          | $0.4 \leq x$           | $0.4 \leq x$            | -          |
| Water Uptake | $x < 0.16$             | $0.125 \leq x \leq 0.4$ | -          |

40 **Table S2: Summary of citric acid experiments performed. Columns from left to right indicate the following: tested compound, generation method, glass transition temperature of the dry organic-water mixture (if applicable), PCU chamber temperature, determined class, activation onset ice supersaturation for assigned class of particles (droplet breakthrough, ice formation, or water uptake), onset temperature for assigned class of particles, PCU chamber RH, inlet of PCU RH, geometric mean diameter of size distribution, geometric standard deviation of size distribution, and total particle concentration entering the SPIN.**

| Compound           | Generation Method | $T_{g,org}$ (°C) | PCU Temperature (°C) | Class        | Onset $S_{ice}$ | Onset Temperature (°C) | PCU RH (%) | PCU Inlet RH (%) | $D_{pg}$ (μm) | $\sigma_g$ | CPC (n cm <sup>-3</sup> ) |
|--------------------|-------------------|------------------|----------------------|--------------|-----------------|------------------------|------------|------------------|---------------|------------|---------------------------|
| ammonium bisulfate | Atomizer          | -                | 24.3 ± 1             | Ice          | 1.37 ± 0.1      | -44.38 ± 0.46          | 0 ± 5      | 0 ± 5            | 0.274         | 1.58       | 4572                      |
| ammonium bisulfate | Atomizer          | -                | 23.6 ± 1             | Ice          | 1.39 ± 0.11     | -39.61 ± 0.51          | 0 ± 5      | 0 ± 5            | 0.278         | 1.56       | 4301                      |
| ammonium bisulfate | Atomizer          | -                | 23.5 ± 1             | Ice          | 1.44 ± 0.13     | -34.46 ± 0.54          | 0 ± 5      | 1 ± 5            | 0.277         | 1.63       | 4151                      |
| ammonium bisulfate | Atomizer          | -                | 23.5 ± 1             | Ice          | 1.31 ± 0.09     | -44.67 ± 0.4           | 0 ± 5      | 0 ± 5            | 0.269         | 1.52       | 15559                     |
| ammonium bisulfate | Atomizer          | -                | 23.5 ± 1             | Ice          | 1.35 ± 0.09     | -39.86 ± 0.44          | 0 ± 5      | 0 ± 5            | 0.267         | 1.58       | 15552                     |
| ammonium bisulfate | Atomizer          | -                | 23.5 ± 1             | Droplet      | 1.44 ± 0.13     | -34.48 ± 0.56          | 0 ± 5      | 1 ± 5            | 0.28          | 1.57       | 4093                      |
| ammonium bisulfate | Atomizer          | -                | 23.5 ± 1             | Droplet      | 1.52 ± 0.14     | -34.58 ± 0.52          | 0 ± 5      | 0 ± 5            | 0.267         | 1.62       | 16240                     |
| ammonium bisulfate | Atomizer          | -                | 24.2 ± 1             | Water Uptake | 1 ± 0.03        | -44.77 ± 0.15          | 0 ± 5      | 0 ± 5            | 0.275         | 1.56       | 4550                      |
| ammonium bisulfate | Atomizer          | -                | 23.6 ± 1             | Water Uptake | 1 ± 0.02        | -39.9 ± 0.12           | 0 ± 5      | 0 ± 5            | 0.277         | 1.56       | 4103                      |
| ammonium bisulfate | Atomizer          | -                | 23.5 ± 1             | Water Uptake | 1 ± 0.02        | -34.82 ± 0.11          | 0 ± 5      | 1 ± 5            | 0.279         | 1.57       | 4055                      |
| ammonium bisulfate | Atomizer          | -                | 23.5 ± 1             | Water Uptake | 1.02 ± 0.03     | -44.95 ± 0.17          | 0 ± 5      | 0 ± 5            | 0.271         | 1.51       | 15527                     |
| ammonium bisulfate | Atomizer          | -                | 23.6 ± 1             | Water Uptake | 1.01 ± 0.05     | -39.95 ± 0.31          | 0 ± 5      | 0 ± 5            | 0.269         | 1.55       | 15643                     |
| ammonium bisulfate | Atomizer          | -                | 23.5 ± 1             | Water Uptake | 1.01 ± 0.05     | -34.94 ± 0.3           | 0 ± 5      | 0 ± 5            | 0.266         | 1.61       | 15505                     |
| ammonium sulfate   | Atomizer          | -                | 24.2 ± 1             | Ice          | 1.26 ± 0.08     | -44.89 ± 0.4           | 0 ± 5      | 0 ± 5            | 0.275         | 1.66       | 7200                      |
| ammonium sulfate   | Atomizer          | -                | 24.7 ± 1             | Ice          | 1.27 ± 0.09     | -39.87 ± 0.43          | 0 ± 5      | 0 ± 5            | 0.27          | 1.71       | 7016                      |
| ammonium sulfate   | Atomizer          | -                | 24.8 ± 1             | Ice          | 1.41 ± 0.1      | -34.94 ± 0.48          | 0 ± 5      | 0 ± 5            | 0.267         | 1.77       | 7750                      |
| ammonium sulfate   | Atomizer          | -                | 24.8 ± 1             | Droplet      | 1.44 ± 0.11     | -34.72 ± 0.48          | 0 ± 5      | 0 ± 5            | 0.267         | 1.76       | 7617                      |
| ammonium sulfate   | Atomizer          | -                | 24.6 ± 1             | Water Uptake | 1 ± 0.02        | -44.76 ± 0.14          | 0 ± 5      | 0 ± 5            | 0.269         | 1.77       | 7098                      |
| ammonium sulfate   | Atomizer          | -                | 24.7 ± 1             | Water Uptake | 1 ± 0.04        | -39.77 ± 0.24          | 0 ± 5      | 0 ± 5            | 0.27          | 1.76       | 7406                      |

|                        |                                   |          |             |              |             |               |       |       |       |      |       |
|------------------------|-----------------------------------|----------|-------------|--------------|-------------|---------------|-------|-------|-------|------|-------|
| ammonium sulfate       | Atomizer                          | -        | 24.8 ± 1    | Water Uptake | 1.05 ± 0.04 | -34.85 ± 0.27 | 0 ± 5 | 0 ± 5 | 0.271 | 1.71 | 8138  |
| citric acid            | Atomizer                          | -13 ± 10 | -65.7 ± 1.1 | Ice          | 1.39 ± 0.1  | -44.77 ± 0.42 | -     | 0 ± 5 | 0.222 | 1.26 | 8692  |
| citric acid            | Atomizer                          | -13 ± 10 | -65.7 ± 1.1 | Ice          | 1.38 ± 0.1  | -39.74 ± 0.45 | -     | 0 ± 5 | 0.221 | 1.25 | 9572  |
| citric acid            | Atomizer                          | -13 ± 10 | 23.2 ± 1    | Droplet      | 1.57 ± 0.13 | -45.43 ± 0.54 | 0 ± 5 | 0 ± 5 | 0.202 | 1.3  | 12048 |
| citric acid            | Atomizer                          | -13 ± 10 | 23.4 ± 1    | Droplet      | 1.5 ± 0.11  | -40.05 ± 0.45 | 0 ± 5 | 0 ± 5 | 0.199 | 1.3  | 8970  |
| citric acid            | Atomizer                          | -13 ± 10 | 23.3 ± 1    | Droplet      | 1.44 ± 0.13 | -35.06 ± 0.51 | 0 ± 5 | 0 ± 5 | 0.204 | 1.3  | 14547 |
| citric acid            | Atomizer                          | -13 ± 10 | -65.9 ± 1.1 | Droplet      | 1.52 ± 0.15 | -34.63 ± 0.53 | -     | 0 ± 5 | 0.22  | 1.24 | 12842 |
| citric acid            | Atomizer                          | -13 ± 10 | 23.2 ± 1    | Water Uptake | 1.22 ± 0.07 | -45.1 ± 0.39  | 0 ± 5 | 0 ± 5 | 0.202 | 1.3  | 11542 |
| citric acid            | Atomizer                          | -13 ± 10 | 23.4 ± 1    | Water Uptake | 1.3 ± 0.09  | -40 ± 0.41    | 0 ± 5 | 0 ± 5 | 0.2   | 1.3  | 8631  |
| citric acid            | Atomizer                          | -13 ± 10 | 23.2 ± 1    | Water Uptake | 1.08 ± 0.07 | -35.06 ± 0.38 | 0 ± 5 | 0 ± 5 | 0.203 | 1.3  | 12986 |
| citric acid            | Atomizer                          | -13 ± 10 | -30.4 ± 1.1 | Water Uptake | 1.18 ± 0.07 | -44.79 ± 0.36 | -     | 0 ± 5 | 0.201 | 1.31 | 10517 |
| citric acid            | Atomizer                          | -13 ± 10 | -30.3 ± 1.1 | Water Uptake | 1.26 ± 0.09 | -34.85 ± 0.45 | -     | 0 ± 5 | 0.205 | 1.3  | 10053 |
| citric acid            | Atomizer                          | -13 ± 10 | -65.8 ± 1.1 | Water Uptake | 1.03 ± 0.05 | -44.87 ± 0.31 | -     | 0 ± 5 | 0.223 | 1.25 | 9378  |
| citric acid            | Atomizer                          | -13 ± 10 | -65.6 ± 1.1 | Water Uptake | 1.34 ± 0.1  | -34.72 ± 0.46 | -     | 0 ± 5 | 0.219 | 1.24 | 11177 |
| citric acid, anhydrous | 145 (°C), 0.1 L min <sup>-1</sup> | -13 ± 10 | -70.4 ± 1.1 | Ice          | 1.23 ± 0.08 | -44.83 ± 0.37 | -     | 0 ± 5 | 0.123 | 1.64 | 16909 |
| citric acid, anhydrous | 145 (°C), 0.1 L min <sup>-1</sup> | -13 ± 10 | -70 ± 1.1   | Ice          | 1.26 ± 0.08 | -39.82 ± 0.42 | -     | 0 ± 5 | 0.14  | 1.68 | 13586 |
| citric acid, anhydrous | 140 (°C), 0.1 L min <sup>-1</sup> | -13 ± 10 | -30 ± 1.1   | Droplet      | 1.49 ± 0.13 | -34.64 ± 0.5  | -     | 0 ± 5 | 0.321 | 2    | 5806  |
| citric acid, anhydrous | 145 (°C), 0.1 L min <sup>-1</sup> | -13 ± 10 | -70.3 ± 1.1 | Droplet      | 1.48 ± 0.13 | -34.81 ± 0.52 | -     | 0 ± 5 | 0.167 | 1.73 | 11284 |
| citric acid, anhydrous | 140 (°C), 0.1 L min <sup>-1</sup> | -13 ± 10 | -30.3 ± 1.1 | Water Uptake | 1 ± 0.02    | -44.97 ± 0.12 | -     | 0 ± 5 | 0.34  | 1.89 | 6942  |
| citric acid, anhydrous | 140 (°C), 0.1 L min <sup>-1</sup> | -13 ± 10 | -30.1 ± 1.1 | Water Uptake | 1 ± 0.02    | -40.08 ± 0.1  | -     | 0 ± 5 | 0.305 | 1.94 | 6542  |
| citric acid, anhydrous | 140 (°C), 0.1 L min <sup>-1</sup> | -13 ± 10 | -30.1 ± 1.1 | Water Uptake | 1 ± 0.01    | -35.03 ± 0.09 | -     | 0 ± 5 | 0.315 | 2.09 | 5724  |
| citric acid, anhydrous | 145 (°C), 0.1 L min <sup>-1</sup> | -13 ± 10 | -70 ± 1.1   | Water Uptake | 1 ± 0.03    | -35.05 ± 0.21 | -     | 0 ± 5 | 0.167 | 1.74 | 11088 |
| dodecyl-OS             | Atomizer                          | 74 ± 13  | 20.7 ± 1    | Droplet      | 1.48 ± 0.11 | -39.95 ± 0.46 | 0 ± 5 | 0 ± 5 | 0.222 | 1.32 | 15318 |

|            |          |          |             |              |             |               |       |       |       |      |       |
|------------|----------|----------|-------------|--------------|-------------|---------------|-------|-------|-------|------|-------|
| dodecyl-OS | Atomizer | 74 ± 13  | 20.6 ± 1    | Droplet      | 1.4 ± 0.12  | -35.07 ± 0.5  | 0 ± 5 | 0 ± 5 | 0.224 | 1.31 | 15751 |
| dodecyl-OS | Atomizer | 74 ± 13  | -           | Water Uptake | 1.32 ± 0.09 | -44.95 ± 0.41 | -     | -     | 0.223 | 1.31 | 15675 |
| dodecyl-OS | Atomizer | 74 ± 13  | 20.7 ± 1    | Water Uptake | 1.32 ± 0.09 | -39.99 ± 0.43 | 0 ± 5 | 0 ± 5 | 0.223 | 1.31 | 15532 |
| dodecyl-OS | Atomizer | 74 ± 13  | 20.6 ± 1    | Water Uptake | 1.24 ± 0.09 | -34.97 ± 0.43 | 0 ± 5 | 0 ± 5 | 0.224 | 1.31 | 15611 |
| ethyl-OS   | Atomizer | -83 ± 34 | 22.6 ± 1    | Droplet      | 1.5 ± 0.12  | -40.15 ± 0.49 | 0 ± 5 | 1 ± 5 | 0.21  | 1.34 | 21038 |
| ethyl-OS   | Atomizer | -83 ± 34 | 22.3 ± 1    | Droplet      | 1.39 ± 0.13 | -34.86 ± 0.51 | 1 ± 5 | 3 ± 5 | 0.212 | 1.33 | 23591 |
| ethyl-OS   | Atomizer | -83 ± 34 | -68.4 ± 1.1 | Droplet      | 1.56 ± 0.13 | -39.87 ± 0.5  | -     | 1 ± 5 | 0.216 | 1.38 | 20572 |
| ethyl-OS   | Atomizer | -83 ± 34 | -68.4 ± 1.1 | Droplet      | 1.49 ± 0.13 | -34.91 ± 0.52 | -     | 1 ± 5 | 0.216 | 1.38 | 21284 |
| ethyl-OS   | Atomizer | -83 ± 34 | 22.9 ± 1    | Water Uptake | 1.38 ± 0.09 | -45.22 ± 0.41 | 0 ± 5 | 0 ± 5 | 0.21  | 1.33 | 20332 |
| ethyl-OS   | Atomizer | -83 ± 34 | 22.6 ± 1    | Water Uptake | 1.32 ± 0.09 | -40.14 ± 0.43 | 0 ± 5 | 1 ± 5 | 0.21  | 1.34 | 21327 |
| ethyl-OS   | Atomizer | -83 ± 34 | 22.3 ± 1    | Water Uptake | 1.25 ± 0.09 | -34.97 ± 0.43 | 0 ± 5 | 3 ± 5 | 0.212 | 1.34 | 23201 |
| ethyl-OS   | Atomizer | -83 ± 34 | -68.3 ± 1.1 | Water Uptake | 1.36 ± 0.09 | -44.77 ± 0.41 | -     | 1 ± 5 | 0.214 | 1.37 | 19318 |
| ethyl-OS   | Atomizer | -83 ± 34 | -68.3 ± 1.1 | Water Uptake | 1.36 ± 0.1  | -40.1 ± 0.44  | -     | 1 ± 5 | 0.216 | 1.38 | 20387 |
| ethyl-OS   | Atomizer | -83 ± 34 | -68.5 ± 1.1 | Water Uptake | 1.35 ± 0.11 | -34.85 ± 0.5  | -     | 1 ± 5 | 0.217 | 1.38 | 21048 |
| methyl-OS  | Atomizer | -83 ± 38 | 23 ± 1      | Droplet      | 1.48 ± 0.11 | -40.04 ± 0.47 | 6 ± 5 | 6 ± 5 | 0.223 | 1.28 | 26211 |
| methyl-OS  | Atomizer | -83 ± 38 | -70.1 ± 1.1 | Droplet      | 1.54 ± 0.15 | -34.99 ± 0.56 | -     | 1 ± 5 | 0.219 | 1.31 | 19084 |
| methyl-OS  | Atomizer | -83 ± 38 | 23.5 ± 1    | Water Uptake | 1.28 ± 0.08 | -44.83 ± 0.38 | 3 ± 5 | 5 ± 5 | 0.22  | 1.28 | 21564 |
| methyl-OS  | Atomizer | -83 ± 38 | 23.1 ± 1    | Water Uptake | 1.2 ± 0.07  | -39.9 ± 0.37  | 6 ± 5 | 7 ± 5 | 0.222 | 1.28 | 26355 |
| methyl-OS  | Atomizer | -83 ± 38 | 23.5 ± 1    | Water Uptake | 1.22 ± 0.08 | -35.04 ± 0.41 | 7 ± 5 | 8 ± 5 | 0.221 | 1.3  | 32730 |
| methyl-OS  | Atomizer | -83 ± 38 | -69.5 ± 1.1 | Water Uptake | 1.04 ± 0.05 | -44.84 ± 0.28 | -     | 0 ± 5 | 0.215 | 1.3  | 12461 |
| methyl-OS  | Atomizer | -83 ± 38 | -69.9 ± 1.1 | Water Uptake | 1.44 ± 0.11 | -39.97 ± 0.47 | -     | 1 ± 5 | 0.218 | 1.31 | 19720 |
| methyl-OS  | Atomizer | -83 ± 38 | -70.2 ± 1.1 | Water Uptake | 1.41 ± 0.11 | -34.95 ± 0.46 | -     | 1 ± 5 | 0.219 | 1.31 | 19216 |
